# Supplementary material
Source: publisher figshare collection journal article supplement (https://diabetesjournals.figshare.com/ndownloader/files/27557144)
Supplement: Supplementary file 1 [file 27557144]

| **Supplemental Table 1.** Primer sequences used in quantitative RT-PCR assays   | Gene | Forward 5’-3’ | Reverse 5’-3’ | | --- | --- | --- | | *Ucp1* | CACCTTCCCGCTGGACACT | TCGGCAATCCTTCTGTTT | | *Prdm16* | CAGCACGGTGAAGCCATTC | GCGTGCATCCGCTTGTG | | *PGC1α* | ACAGGAACAGCAGCAGAG | TAAGGTTCGCTCAATAGTC | | *Cidea* | TGCTCTTCTGTATCGCCCAGT | GCCGTGTTAAGGAATCTGCTG | | *Dio2* | AATTATGCCTCGGAGAAGACCG | GGCAGTTGCCTAGTGAAAGG | | *Cox8b* | GAACCATGAAGCCAACGACT | GCGAAGTTCACAGTGGTTCC | | *mtTFA* | GTCTGTATTCCGAAGTGTTT | TTGCATCTGGGTGTTTAG | | *ATP syn* | GGTTCATCCTGCCAGAGACTA | AATCCCTCATCGAACTGGACG | | *Cpt1b* | ATGTATCGCCGCAAACTG | CCTGGGATGCGTGTAGTG | | *LCAD* | TCACCAACCGTGAAGCTCGA | CCAAAAAGAGGCTAATGCCAT | | *MCAD* | ATGCCTGTGATTCTTGCT | TAACATACTCGTCACCCTTC | | *PPARγ* | TGCTGTTATGGGTGAAACTCT | CGCTTGATGTCAAAGGAATGC | | *CEBPβ* | ACGACTTCCTCTCCGACCTCT | CGAGGCTCACGTAACCGTAGT | | *ACC* | TGTTGGGGTTATTTCAGTGTTGC | TGTCCAGCCAGCCAGTGTCG | | *FASN* | CACAGATGATGACAGGAGATGGA | TCGGAGTGAGGCTGGGTTGATA | | *CD36* | GATGACGTGGCAAAGAACAG | TCCTCGGGGTCCTGAGTTAT | | *IL-6* | TAGTCCTTCCTACCCCAATTTCC | TTGGTCCTTAGCCACTCCTTC | | *TNFα* | ACACTCAGATCATCTTCTCAAAATTCG | GTGTGGGTGAGGAGCACGTAGT | | *36b4* | GAAACTGCTGCCTCACATCCG | GCTGGCACAGTGACCTCACACG | | *18S* | AGTCCCTGCCCTTTGTACACA | CGATCCGAGGGCCTCACT | |
| --- | --- | --- | --- | --- | --- | --- | --- | --- | --- | --- | --- | --- | --- | --- | --- | --- | --- | --- | --- | --- | --- | --- | --- | --- | --- | --- | --- | --- | --- | --- | --- | --- | --- | --- | --- | --- | --- | --- | --- | --- | --- | --- | --- | --- | --- | --- | --- | --- | --- | --- | --- | --- | --- | --- | --- | --- | --- | --- | --- | --- | --- | --- | --- |

| **Supplemental Table2.** Primer sequences used in ChIP-qPCR and (h)MeDIP   | Gene | Forward 5’-3’ | Reverse 5’-3’ | | --- | --- | --- | | *Ucp1* enhancer | TCTACAGCGTCACAGAGGGT | TGATTTCTGCTCTTCTGGCA | | *Ucp1* TSS | AGTCCCACTAGCAGCTCTTTG | GACCCGTTAAGCCCAGATT | | Dio2 | GCTCTTAACCACTGAGCCATC | ATGCCATAGACATACAAGCAACC | | Prdm16 (h)MeDIP a | AGAGAGAAGTGAGGTGAAGACCGAGAA | ACACACTATCTTCATCTCCCTAGCATTGT | | Prdm16 (h)MeDIP b | GCATGTGCGAAGGTGTCCAAA | TGGATCGCATGGTGTCGGCT | | Prdm16 (h)MeDIP c | CCAAAGCTTGAAGGAGAGAGACGTAAA | TCGGTTCTTGGCCTCCAGAGAAG | | Negtive | CTGGGACGATGAATGAGGAT | AGCAGCTGGCACCTAAACAG | |  |
| --- | --- | --- | --- | --- | --- | --- | --- | --- | --- | --- | --- | --- | --- | --- | --- | --- | --- | --- | --- | --- | --- | --- | --- | --- | --- |
